# Supplementary material
Source: publisher site journal article supplement (https://cdn.jamanetwork.com/ama/content_public/journal/intemed/935385/ioi160016supp2_prod.pdf)
Supplement: Supplementary file 1 [file ioi160016supp2_prod.pdf]

## Supplementary Online Content

Bretthauer M, Kaminski MF, Løberg M, et al. Population-based colonoscopy screening for colorectal cancer: a randomized clinical trial. *JAMA Intern Med*. Published online May 9, 2016. doi:10.1001/jamainternmed.2016.0960.

**eFigure 1.** Participant Pain During and After Colonoscopy per Country With CO<sub>2</sub> or Air Insufflation, Stratified by Sedation

**eFigure 2.** Statistical Power of the NordICC Trial

**eTable 1.** Pain During and After Colonoscopy, Respectively, Using Air or Carbon Dioxide (CO<sub>2</sub>) Insufflation in the Participating Countries

**eTable 2.** Adenoma Detection Rates in the Proximal and in the Distal Colon in the Participating Countries

This supplementary material has been provided by the authors to give readers additional information about their work

**eFigure 1. Participant Pain During and After Colonoscopy per Country With CO<sub>2</sub> or Air Insufflation, Stratified by Sedation**

Panel A: Pain *during* colonoscopy (Reference category: colonoscopies performed in Poland with air for insufflation and no sedation)

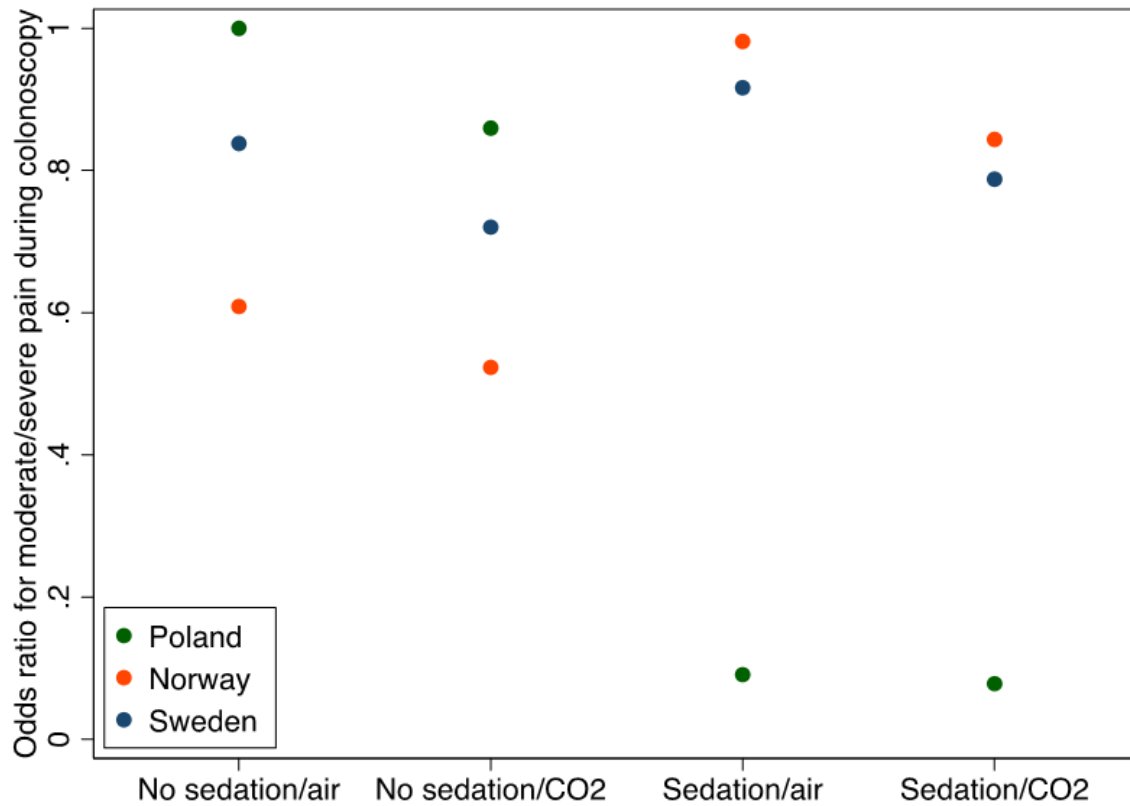

Panel B: Pain *after* colonoscopy (Reference category: colonoscopies performed in Poland with air for insufflation and no sedation)

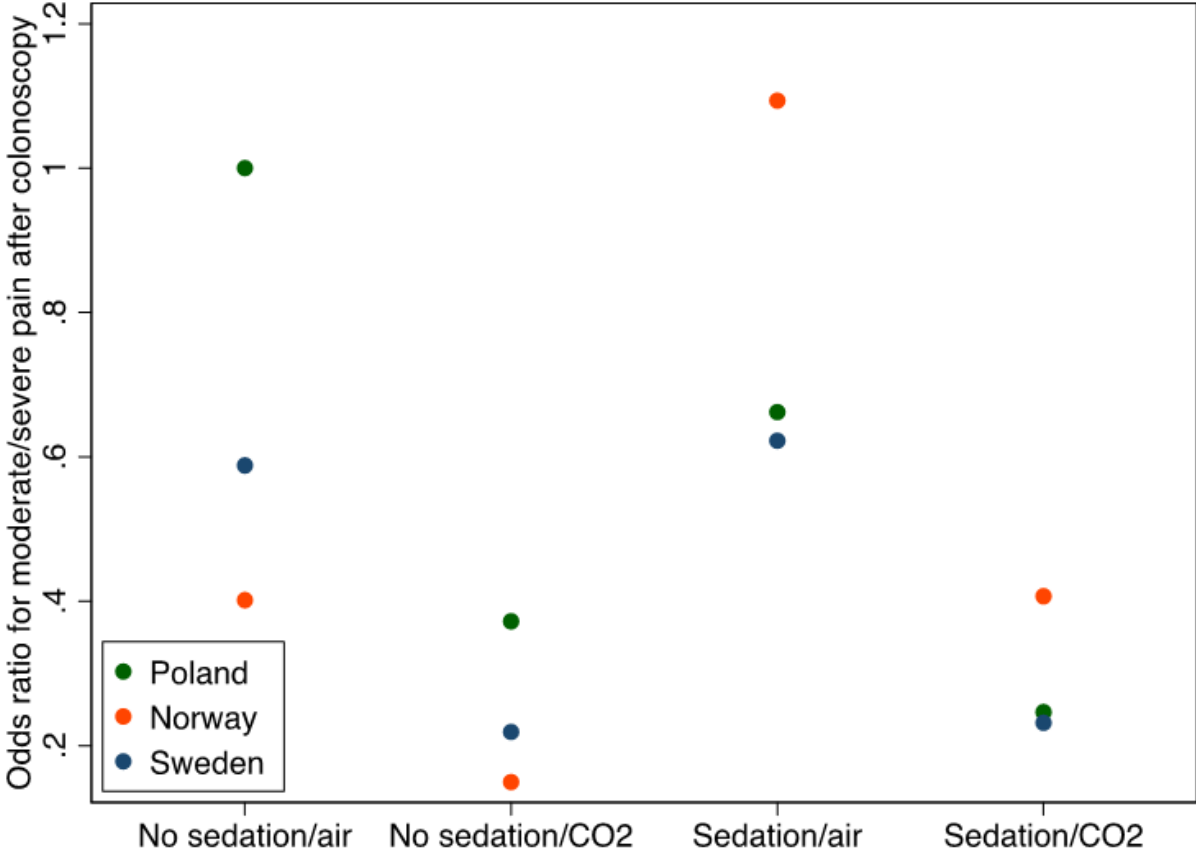

**eFigure 2. Statistical Power of the NordICC Trial**

The figure shows different scenarios for statistical power with the actual achieved participation rate of 40.0%. The points display the power to detect a significant difference between the screening group and the control group during increasing follow-up time in an intention-to-treat analysis, given an effect of the intervention in those who participated of 60% (red) and 50% (blue).

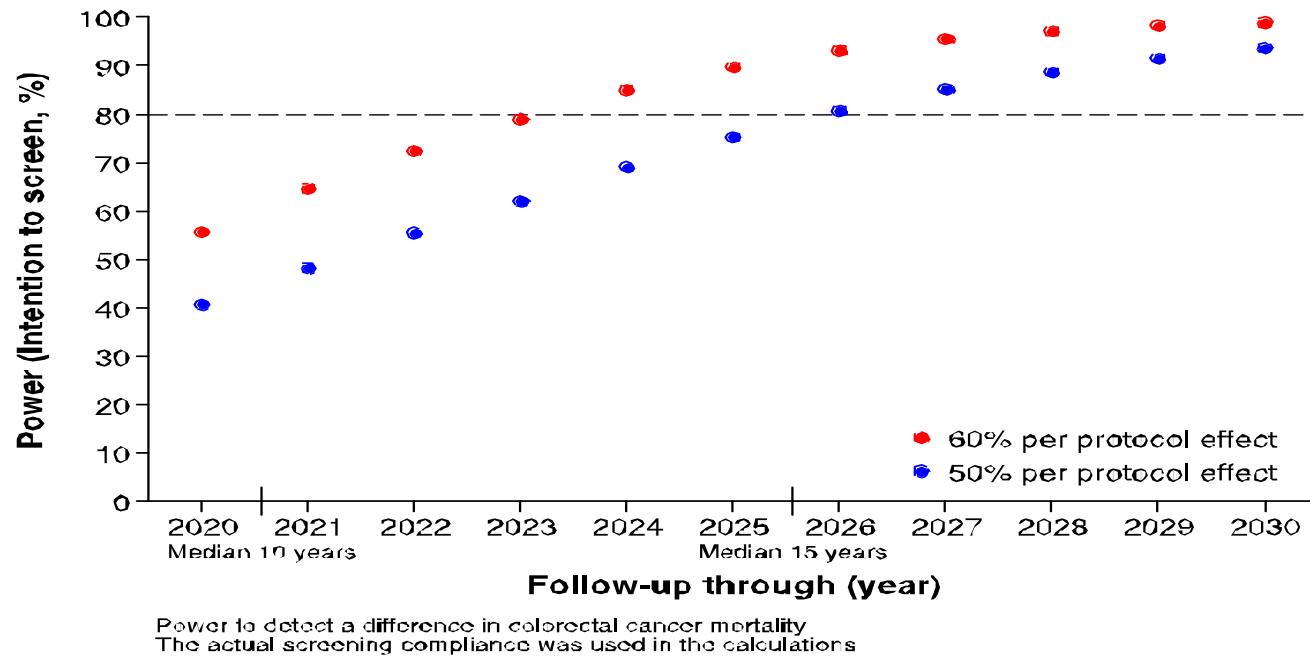

**eTable 1.** Pain During and After Colonoscopy, Respectively, Using Air or Carbon Dioxide (CO<sub>2</sub>) Insufflation in the Participating Countries

|                         |                      | Total            |                  | Norway           |                  | Poland           |                  | Sweden           |                  |
|-------------------------|----------------------|------------------|------------------|------------------|------------------|------------------|------------------|------------------|------------------|
|                         |                      | Air insufflation | CO2 insufflation |
| Pain during colonoscopy |                      |                  |                  |                  |                  |                  |                  |                  |                  |
|                         | No/little pain       | 2,859 (79.2)     | 4,219 (80.0)     | 41 (85.4)        | 3,628 (80.9)     | 2,811 (79.2)     | 359 (77.9)       | 7 (70.0)         | 232 (71.0)       |
|                         | Moderate/severe pain | 749 (20.8)       | 1,052 (20.0)     | 7 (14.6)         | 855 (19.1)       | 739 (20.8)       | 102 (22.1)       | 3 (30.0)         | 95 (29.1)        |
| Pain after colonoscopy  |                      |                  |                  |                  |                  |                  |                  |                  |                  |
|                         | No/little pain       | 3,010 (83.3)     | 5,040 (95.8)     | 2,960 (83.3)     | 427 (92.2)       | 41 (85.4)        | 4,310 (96.2)     | 9 (90.0)         | 307 (94.5)       |
|                         | Moderate/severe pain | 602 (16.7)       | 223 (4.23)       | 594 (16.7)       | 36 (7.8)         | 7 (14.6)         | 169 (3.8)        | 1 (1.0)          | 18 (5.5)         |

**eTable 2.** Adenoma Detection Rates in the Proximal and in the Distal Colon in the Participating Countries

|                   | Overall,<br>n(%) | Norway       | Poland       | Sweden    | Netherlands |
|-------------------|------------------|--------------|--------------|-----------|-------------|
| Adenoma detection | 3,863 (30.7)     | 1,455 (27.2) | 2,112 (35.2) | 70 (14.4) | 226 (31.0)  |
| Proximal          | 2,274 (18.1)     | 794 (14.8)   | 1,315 (21.9) | 28 (5.8)  | 137 (18.8)  |
| Distal            | 2,408 (19.1)     | 947 (17.7)   | 1,269 (21.1) | 51 (10.5) | 141 (19.3)  |
